# Supplementary material for: Mediterranean Diet Reduces Social Isolation and Anxiety in Adult Female Nonhuman Primates
Source: MDPI journal article supplement (doi:10.3390/nu14142852), 2022-07-12
Supplement: s1 [file s1]

**Supplementary Table S1.** Experimental Diet Compositions.

| Western-like Diet                 |       | Mediterranean-like Diet                |       |
|-----------------------------------|-------|----------------------------------------|-------|
| Ingredient                        | g/ kg | Ingredient                             | g/kg  |
| Casein, USP                       | 85.0  | Casein, USP                            | 17.4  |
| Whey Protein - 895 895            | 85.0  | Whey protein - 895                     | 17.4  |
|                                   |       | Dried Egg white                        | 26.1  |
|                                   |       | Fishmeal (Menhaden)                    | 26.1  |
|                                   |       | Walnuts                                | 8.7   |
|                                   |       | Black Bean flour                       | 43.5  |
|                                   |       | Garbanzo Bean flour                    | 17.4  |
|                                   |       | Wheat Flour (all purpose)              | 243.5 |
| Dextrin                           | 260.0 | Dextrin                                | 96.6  |
| Sucrose                           | 180.0 | Sucrose                                | 34.8  |
| High Fructose Corn Syrup 55       | 70.0  | Banana                                 | 1304  |
|                                   |       | Applesauce                             | 38.2  |
|                                   |       | Tomato paste                           | 17.4  |
| Cellulose (Alphacel) <sup>1</sup> | 79.4  | Cellulose (Alphacel) <sup>1</sup>      | 94.8  |
| Lard                              | 41.5  | Olive Oil (Filippo Berio Extra Virgin) | 61.7  |
| Beef Tallow HHR                   | 40.0  | Menhaden Oil (Omegapure)               | 8.7   |
| Butter, lightly salted            | 12.5  | Butter, lightly salted                 | 8.7   |
| Corn Oil                          | 35.0  | Corn Oil                               | 10.4  |
| Flaxseed oil                      | 3.0   | Flaxseed oil                           | 1.7   |
| Dried Egg Yolk                    | 6.0   | Dried Egg Yolk                         | 14.8  |
| Crystalline Cholesterol           | 0.4   |                                        |       |
| Complete Vitamin Mix (Teklad)     | 25.0  | Complete Vitamin Mix (Teklad)          | 21.7  |
| Mineral Mix w/o Ca, P, NaCl       | 50.0  | Mineral Mix w/o Ca, P, NaCl            | 43.5  |
| Calcium Carbonate                 | 4.3   | Calcium Carbonate                      | 3.7   |
| Calcium Phosphate, Monobasic      | 7.5   | Calcium Phosphate, Monobasic           | 6.5   |
| NaCl (Table Salt)                 | 16.0  | NaCl (Table Salt)                      | 6.3   |
| TOTAL                             | 1000  | TOTAL                                  | 1000  |

<sup>1</sup> Total Fiber (% of diet): WEST: 7.94; MED: 12.7

**Supplementary Table S2.** Dependent Variables Measured or Calculated in Behavioral Characterization of Diet Trial.

| Dependent Variable                       | Operational Definition                                                                                                                                                     |
|------------------------------------------|----------------------------------------------------------------------------------------------------------------------------------------------------------------------------|
| <i>Affiliation Behaviors Observed</i>    |                                                                                                                                                                            |
| Percent of Time Spent Alone              | Percent of time spent out of monkey's arm's reach of conspecifics                                                                                                          |
| Percent of Time Spent in Body Contact    | Percent of time spent in contact with conspecific(s)                                                                                                                       |
| Percent of Time Spent in Close Proximity | Percent of time spent within monkey's arm's reach of conspecific(s)                                                                                                        |
| <i>Activity Behaviors Observed</i>       |                                                                                                                                                                            |
| Percent of Time Spent Attentive          | Percent of time monkey alert and attending to an object or event                                                                                                           |
| Percent of Time Spent Fearfully Scanning | Percent of time visual scanning of the environment                                                                                                                         |
| Percent of Time Spent in Locomotion      | Percent of time walking or running along the ground or over suspended surfaces (> 1 m/min)                                                                                 |
| Percent of Time Spent Investigating      | Percent of time exploratory behavior directed at environment                                                                                                               |
| Percent of Time Spent Lying Down         | Percent of time lying down with eyes open                                                                                                                                  |
| Percent of Time Spent Resting            | Percent of time resting with eyes closed or asleep                                                                                                                         |
| <i>Anxiety Behavior Observed</i>         |                                                                                                                                                                            |
| Rate of Anxiety Behavior                 | Frequency of anxiety-related behaviors, including scratching, itching, and grooming self                                                                                   |
| <i>Social Behaviors Observed</i>         |                                                                                                                                                                            |
| Percent of Time Spent Being Groomed      | Percent of time being groomed by conspecific(s)                                                                                                                            |
| Percent of Time Spent Grooming           | Percent of time grooming conspecific(s)                                                                                                                                    |
| Rate of Extreme Aggression               | Frequency of extreme aggressive behaviors including bite, slap, grab, chase, charge, and lunge                                                                             |
| Rate of Extreme Aggression Received      | Frequency of receiving extreme aggressive behaviors including bite, slap, grab, chase, charge, and lunge                                                                   |
| Rate of Extreme Submission               | Frequency of extreme submissive behaviors including scream, squeal, scream threat, crouch, and flee                                                                        |
| Rate of Extreme Submission Received      | Frequency of receiving extreme submissive behaviors including scream, squeal, scream threat, crouch, and flee                                                              |
| Rate of Mild Aggression                  | Frequency of mild aggressive behaviors including display, displace, and threat (open mouth, stare, or yawn)                                                                |
| Rate of Mild Aggression Received         | Frequency of receiving mild aggressive behaviors including displace and threat (open mouth, stare, or yawn)                                                                |
| Rate of Mild Submission                  | Frequency of mild submissive behaviors including lip smack, grimace, submissive present, crouch and move away                                                              |
| Rate of Mild Submission Received         | Frequency of receiving mild submissive behaviors including lip smack, grimace, submissive present, crouch and move away                                                    |
| <i>Composite Behavior Calculated</i>     |                                                                                                                                                                            |
| Diet-Altered Behavior (DAB) Score        | Linear combination of all 20 observed behaviors, scaled and multiplied by the loading of each variable onto PC2 (from Johnson et al., 2021) and weighted by its eigenvalue |

**Supplementary Table S3.** Mediterranean vs. Western Group DAB Scores by Month.

| Month of Observation<br>(months on diet) | Mediterranean Group<br><i>Mean (S.D.)</i> | Western Group<br><i>Mean (S.D.)</i> | Statistical Analysis  | Test Statistic | <i>p-value</i>       | <i>Holm-Bonferroni adjusted p-value</i> |
|------------------------------------------|-------------------------------------------|-------------------------------------|-----------------------|----------------|----------------------|-----------------------------------------|
| <i>Baseline</i>                          | -0.09 (1.4)                               | 0.07 (1.6)                          | t-test (df = 36.0)    | -0.3           | 0.73                 | -                                       |
| 1 (3)                                    | 0.54 (1.9)                                | -0.43 (1.5)                         | ANCOVA (df = [1, 35]) | 27.2           | <b>0.014*</b>        | 0.070                                   |
| 2 (4)                                    | 0.56 (2.0)                                | -0.45 (1.7)                         | ANCOVA (df = [1, 35]) | 29.1           | 0.016                | 0.070                                   |
| 3 (5)                                    | 0.54 (1.9)                                | -0.44 (1.6)                         | ANCOVA (df = [1, 35]) | 27.8           | 0.015                | 0.070                                   |
| 4 (6)                                    | 1.09 (1.7)                                | -0.88 (1.4)                         | ANCOVA (df = [1, 35]) | 15.9           | $1.8 \times 10^{-5}$ | <b><math>3.0 \times 10^{-4}</math></b>  |
| 5 (7)                                    | 1.18 (1.8)                                | -0.95 (1.6)                         | ANCOVA (df = [1, 35]) | 17.4           | $2.4 \times 10^{-5}$ | <b><math>3.6 \times 10^{-4}</math></b>  |
| 6 (8)                                    | 1.03 (1.9)                                | -0.83 (1.6)                         | ANCOVA (df = [1, 35]) | 14.7           | $2.0 \times 10^{-4}$ | <b>0.0024</b>                           |
| 7 (9)                                    | 0.89 (1.6)                                | -0.72 (1.8)                         | ANCOVA (df = [1, 35]) | 60.7           | $1.3 \times 10^{-5}$ | <b><math>2.3 \times 10^{-4}</math></b>  |
| 8 (10)                                   | 1.23 (1.6)                                | -1.00 (1.4)                         | ANCOVA (df = [1, 35]) | 10.6           | $4.3 \times 10^{-6}$ | <b><math>8.6 \times 10^{-5}</math></b>  |
| 9 (11)                                   | 1.17 (1.9)                                | -0.95 (1.4)                         | ANCOVA (df = [1, 35]) | 12.6           | $2.9 \times 10^{-5}$ | <b><math>4.0 \times 10^{-4}</math></b>  |
| 10 (12)                                  | 1.22 (1.5)                                | -0.99 (1.4)                         | ANCOVA (df = [1, 35]) | 4.4            | $1.8 \times 10^{-5}$ | <b><math>3.0 \times 10^{-4}</math></b>  |
| 11 (13)                                  | 1.26 (1.1)                                | -1.02 (1.5)                         | ANOVA (df = [1, 36])  | 26.4           | $9.9 \times 10^{-6}$ | <b><math>1.9 \times 10^{-4}</math></b>  |
| 12 (14)                                  | 1.01 (1.6)                                | -0.82 (1.4)                         | ANCOVA (df = [1, 35]) | 4.9            | $2.9 \times 10^{-4}$ | <b>0.0032</b>                           |
| 13 (15)                                  | 1.36 (2.1)                                | -1.10 (0.9)                         | ANCOVA (df = [1, 35]) | 10.0           | $2.6 \times 10^{-6}$ | <b><math>5.4 \times 10^{-5}</math></b>  |
| 14 (16)                                  | 1.66 (1.3)                                | -1.34 (1.7)                         | ANCOVA (df = [1, 35]) | 19.4           | $6.2 \times 10^{-9}$ | <b><math>1.5 \times 10^{-7}</math></b>  |
| 15 (17)                                  | 1.55 (1.4)                                | -1.26 (1.6)                         | ANCOVA (df = [1, 35]) | 7.0            | $2.4 \times 10^{-7}$ | <b><math>5.4 \times 10^{-6}</math></b>  |
| 16 (18)                                  | 0.68 (1.3)                                | -0.55 (1.5)                         | ANCOVA (df = [1, 35]) | 11.8           | 0.0020               | <b>0.016</b>                            |
| 17 (19)                                  | 1.20 (1.5)                                | -0.97 (1.3)                         | ANCOVA (df = [1, 35]) | 19.4           | $3.6 \times 10^{-7}$ | <b><math>8.0 \times 10^{-6}</math></b>  |
| 18 (20)                                  | 0.97 (1.8)                                | -0.78 (1.5)                         | ANCOVA (df = [1, 35]) | 8.9            | $6.1 \times 10^{-4}$ | <b>0.0061</b>                           |
| 19 (21)                                  | 1.20 (1.8)                                | -0.84 (1.5)                         | ANCOVA (df = [1, 35]) | 14.6           | $7.8 \times 10^{-5}$ | <b>0.0010</b>                           |
| 20 (22)                                  | 0.30 (2.1)                                | -0.24 (1.4)                         | ANCOVA (df = [1, 35]) | 10.0           | 0.23                 | 0.23                                    |
| 21 (23)                                  | 0.86 (2.0)                                | -0.70 (1.6)                         | ANCOVA (df = [1, 35]) | 12.7           | 0.0020               | <b>0.016</b>                            |
| 22 (24)                                  | 0.70 (1.9)                                | -0.56 (1.2)                         | ANCOVA (df = [1, 35]) | 15.4           | 0.0030               | <b>0.018</b>                            |
| 23 (25)                                  | 0.54 (1.9)                                | -0.44 (1.3)                         | ANCOVA (df = [1, 35]) | 7.6            | 0.032                | 0.070                                   |
| 24 (26)                                  | 0.86 (1.8)                                | -0.70 (1.5)                         | ANCOVA (df = [1, 35]) | 15.9           | $7.4 \times 10^{-4}$ | <b>0.0066</b>                           |

\**A priori* hypothesis, thus reported p-value was not corrected for multiple hypothesis testing.

**Supplementary Note S1: Diet Preparation.** Ten-kilogram batches of the experimental diets were prepared at a time. Batches were stored frozen at -20°C until thawing. Daily portions were thawed in the refrigerator prior to feeding. To prevent oxidation of lipids and polyphenols, extra-virgin olive oil was stored under argon. To ensure stability of each of the experimental diets, samples from three batches – one early, one midway, and one near study's end - were assayed for macronutrient and fatty acid content.
